# Supplementary material for: A novel detection of hydrogen peroxide based on a luminescent polyoxometalate
Source: Royal Society of Chemistry journal article supplement (doi:10.1039/c1dt10259a), 2011-01-01
Supplement: c1dt10259a.pdf [file c1dt10259a.pdf]

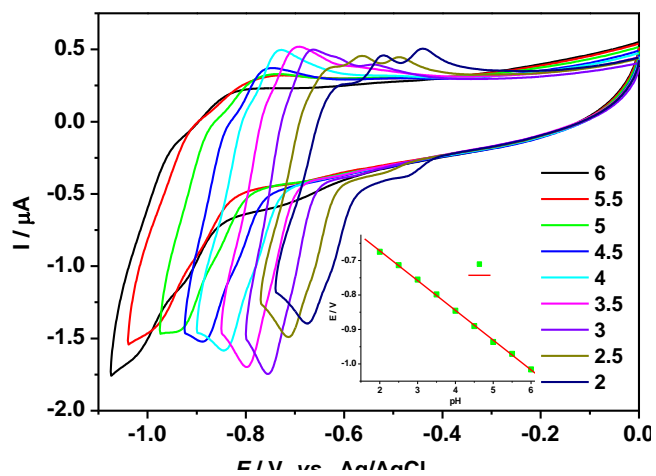

**Fig. SI1.** CVs of 0.5 mM Eu-GeW<sub>11</sub> using a bare glassy carbon electrode (GCE) as a working electrode at different pHs.

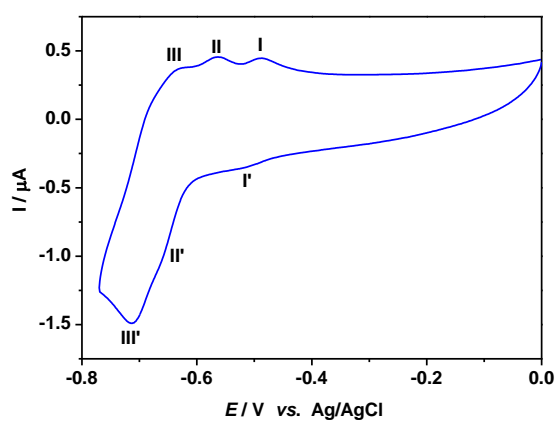

**Fig. SI2.** CV of 0.5 mM Eu-GeW<sub>11</sub> using a bare glassy carbon electrode (GCE) as a working electrode at pH 3.0.
